# Supplementary material for: A chromatin remodelling SWI/SNF subunit, Snr1, regulates neural stem cell determination and differentiation
Source: PubMed Central journal article supplement (PMC10323235; doi:10.1242/dev.201484), 2023-06-30
Supplement: develop-150-201484-s1.pdf [file develop-150-201484-s1.pdf]

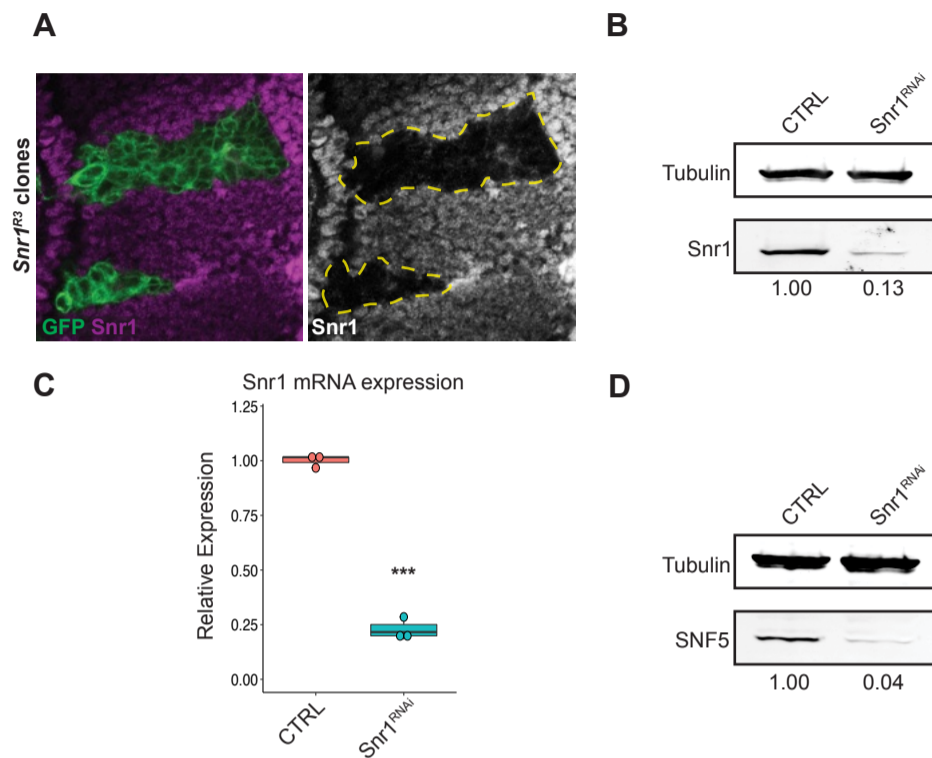

**Fig. S1. Validation of *Snr1* antibodies and RNAi knockdown efficiency.** A) *Snr1<sup>R3</sup>* MARCM clones (outlined with yellow dashed line) in the optic lobe marked by GFP (green). *Snr1* marked by an antibody generated in this study (magenta). B) *Snr1* protein expression in control brains (CTRL) and in brains expressing *Snr1<sup>RNAi</sup>* in neuroblasts (KD) (*insc>Snr1<sup>RNAi</sup>*). *Snr1* levels (labelled with *Snr1* antibody) normalized to Tubulin (n=3, 0.13±0.06, p=1e-5). C) Relative *Snr1* RNA expression in control brains (CTRL) (n=3, 1.00±0.03) and brains expressing *Snr1<sup>RNAi</sup>* in neuroblasts (KD) (n=3, 0.23±0.05). P=2e-4. \*\*\* = p<0.001. D) *Snr1* protein expression in control brains (CTRL) and brains expressing *Snr1<sup>RNAi</sup>* in neuroblasts (KD). *Snr1* levels (labelled with SNF5 antibody) normalized to Tubulin (n=3, 0.04±0.02, p=5e-8).

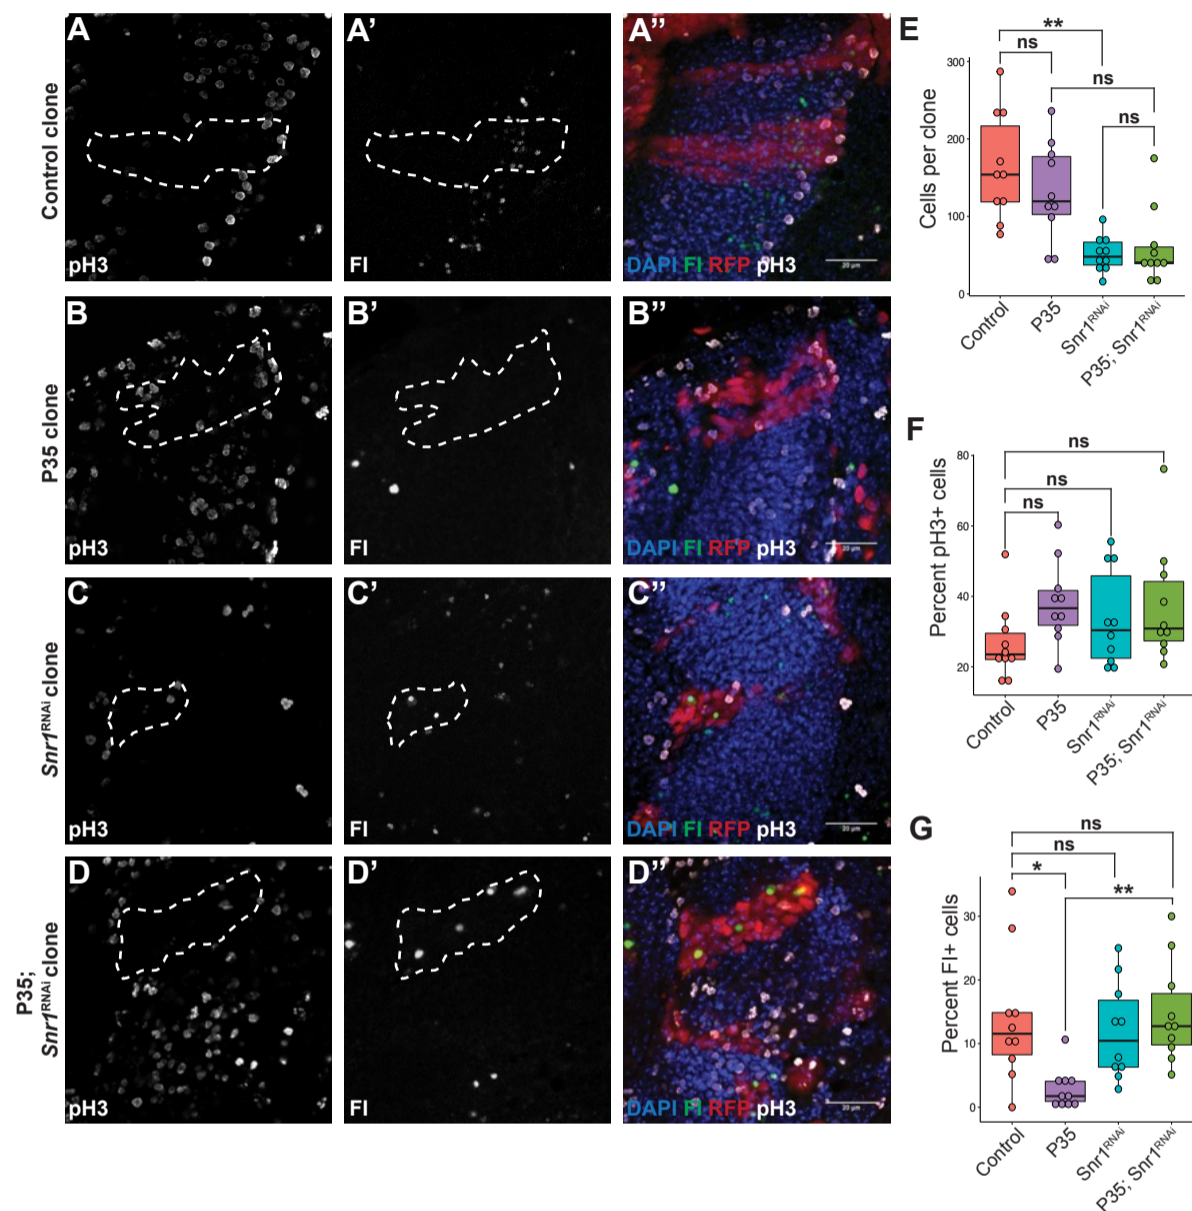

**Fig. S2. Mitotic cell number and apoptosis are not affected by *Snr1* knockdown. A-A'')** Control FLP-out clone. B-B'') FLP-out clone expressing P35. C-C'') FLP-out clone expressing *Snr1*<sup>RNAi</sup>. D-D'') FLP-out clone expressing P35 and *Snr1*<sup>RNAi</sup>. A-D'') Dying cells labelled with fluorescein (FI). Mitotic cells labelled with phospho-histone H3 (pH3). Clones outlined with white dashed lines. Scale bar = 20 μm. E) Cells per clone in control (n=10, 164± 69), *Snr1*<sup>RNAi</sup> (n=10, 52± 23), P35 (n=10, 132± 63), and P35;*Snr1*<sup>RNAi</sup> (n=10, 60± 49) clones. p=2e-4. F) Percent mitotic cells identified based on pH3 signal in control (n=10, 27± 11%), *Snr1*<sup>RNAi</sup> (n=10, 34± 14%), P35 (n=10, 38± 12%), and P35;*Snr1*<sup>RNAi</sup> (n=10, 37± 17%) clones. p=0.13. G) Percent dying cells based on FI signal in control (n=10, 14± 10%), *Snr1*<sup>RNAi</sup> (n=10, 12± 8%), P35 (n=10, 3± 3%), and P35;*Snr1*<sup>RNAi</sup> (n=10, 15± 8%) clones. n=10. p=1e-3.

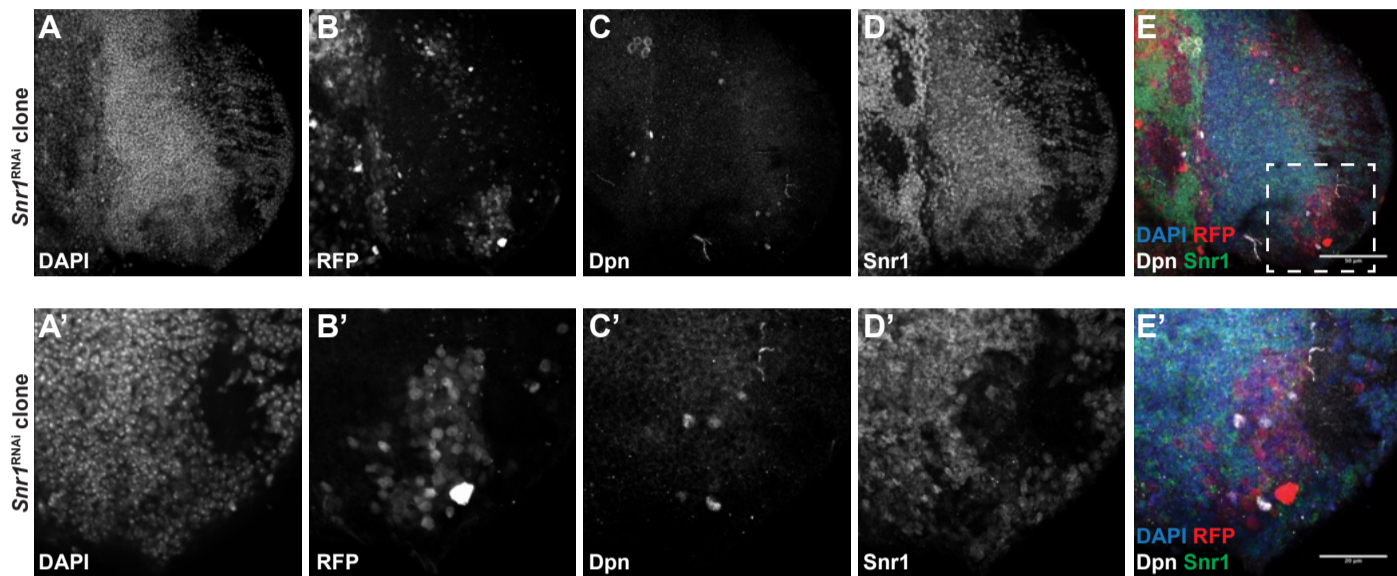

**Fig. S3. *Snr1<sup>RNAi</sup>* clones express neuroblast marker Deadpan in the adult optic lobe.** A-E) FLP-out *Snr1<sup>RNAi</sup>* clone in the adult brain. Clone labelled with RFP. Neuroblasts labelled with Dpn. Scale bar = 50  $\mu$ m. A'-E') Higher magnification of region outlined with white dashed line in E. Scale bar = 20  $\mu$ m.

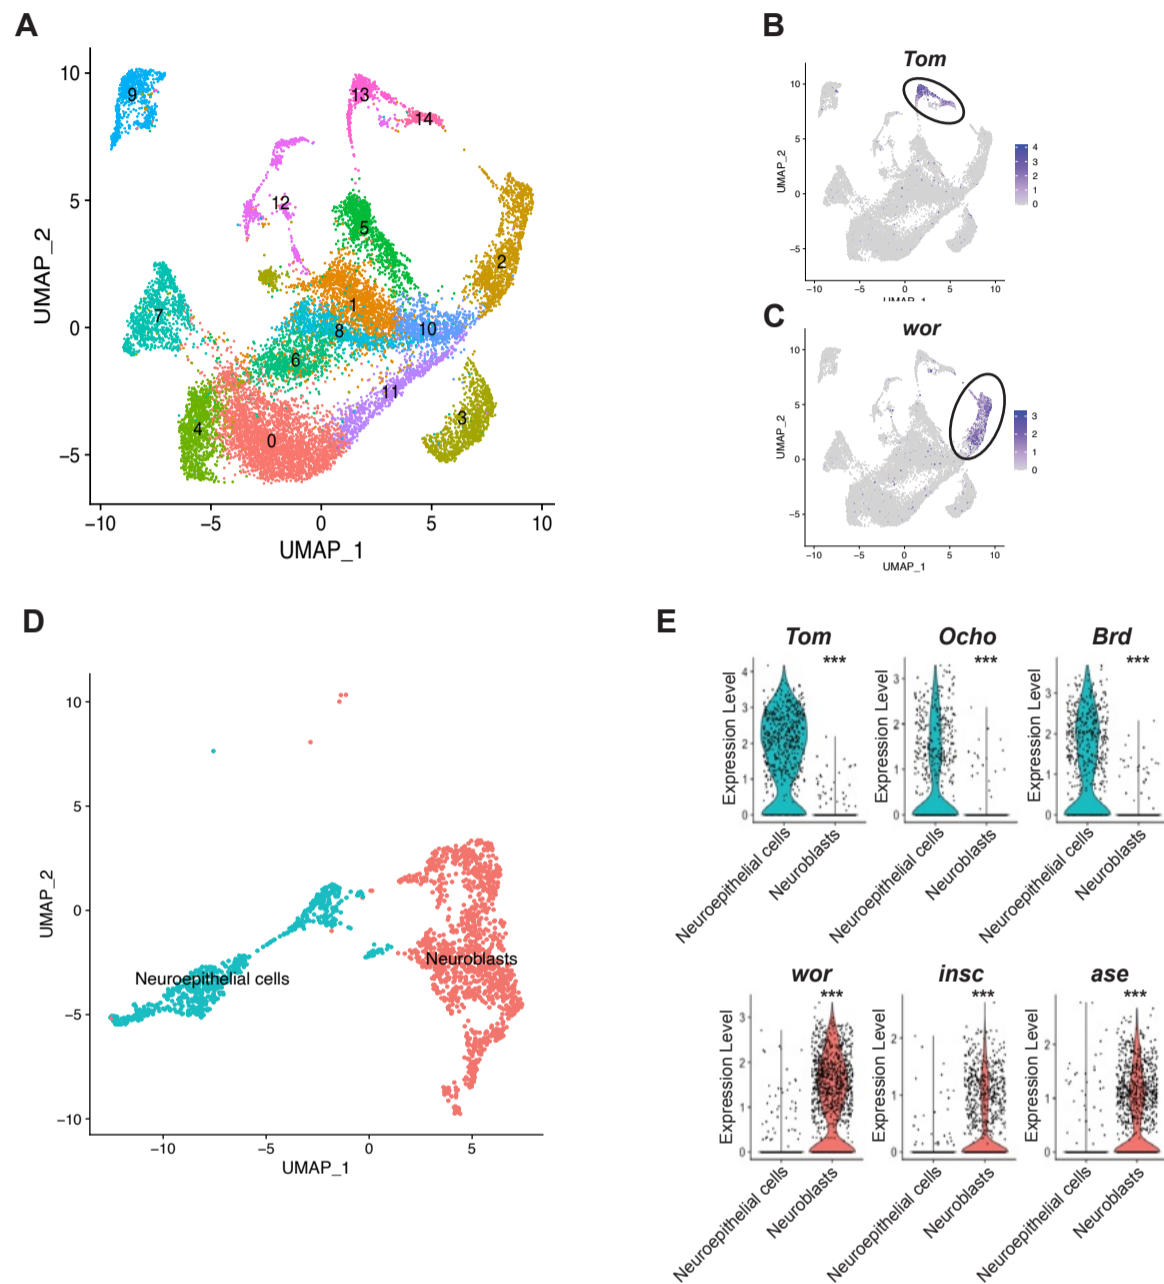

**Fig. S4. Identification of optic lobe neuroepithelial cells and neuroblasts by single cell**

**sequencing.** A) UMAP of whole larval brain. B) Expression of neuroepithelial cell marker *Twin of m4* (*Tom*).

C) Expression of neuroblast marker *worniu* (*wor*). B-C) Encircled cells used for re-clustering in

D. D) Re-clustering of neuroepithelial cells (blue) (n=648) and neuroblasts (red) (n=1267). E)

Expression in clusters shown in D of neuroepithelial markers *Tom* (log<sub>2</sub>FC=-3.09, p=5e-291),

*Ocho* (log<sub>2</sub>FC=-1.81, p=5e-137), *bearded* (*Brd*) (log<sub>2</sub>FC=-2.47, p=3e-189). Expression in

clusters shown in D of neuroblast markers *worniu* (*wor*) (log<sub>2</sub>FC=1.92, p=2e-133), *insc*

(log<sub>2</sub>FC=-0.82, p=4e-56), *asense* (*ase*) (log<sub>2</sub>FC=1.05, p=1e-84). \*\*\*=p<0.001.

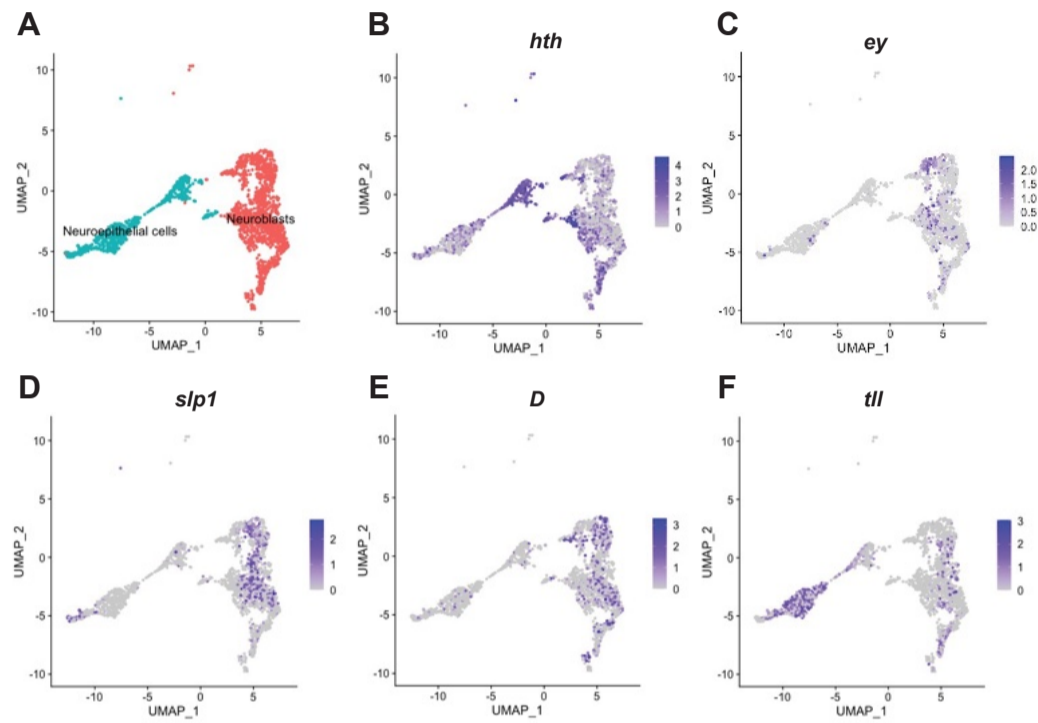

**Fig. S5. Expression of optic lobe temporal transcription factors.** UMAPs showing expression levels in neuroepithelial cells and neuroblasts. A) UMAPs show cells represented in Fig. S4D. B) Expression of *homothorax* (*hth*), C) *eyeless* (*ey*), D) *sloppy paired 1* (*slp1*), E) *Diachete* (*D*), and F) *tailless* (*tll*).

**A**

| Gene                    | Average Log2 Fold Change | P-value  |
|-------------------------|--------------------------|----------|
| <i>E(spl)malpha-BFM</i> | -1.871                   | 1.68e-25 |
| <i>E(spl)mdelta-HLH</i> | -2.009                   | 5.45e-21 |
| <i>E(spl)m3-HLH</i>     | -1.262                   | 3.00e-15 |
| <i>E(spl)m5-HLH</i>     | -1.381                   | 5.10e-13 |
| <i>E(spl)mgamma-HLH</i> | -0.938                   | 9.28e-12 |
| <i>E(spl)m7-HLH</i>     | -0.836                   | 1.08e-09 |
| <i>E(spl)m8-HLH</i>     | -0.657                   | 1.77e-08 |
| <i>E(spl)m2-BFM</i>     | -1.026                   | 1.61e-07 |
| <i>E(spl)m4-BFM</i>     | -0.750                   | 2.22e-07 |
| <i>E(spl)mbeta-HLH</i>  | -0.875                   | 2.26e-07 |
| <i>E(spl)m6-BFM</i>     | -0.554                   | 6.31e-04 |

**B**

| Gene          | Average Log2 Fold Change | P-value  |
|---------------|--------------------------|----------|
| <i>Cad99C</i> | 0.458                    | 1.82e-24 |
| <i>ds</i>     | 0.738                    | 2.75e-10 |
| <i>ft</i>     | 0.770                    | 1.91e-09 |

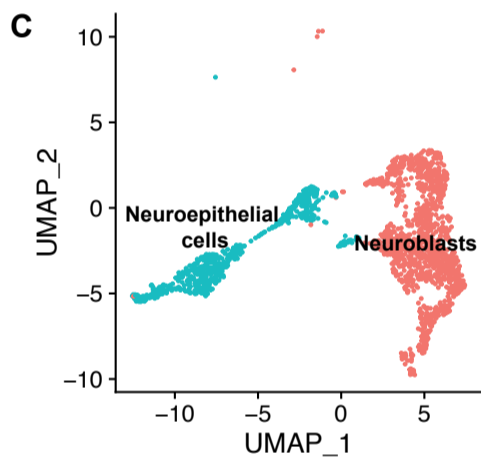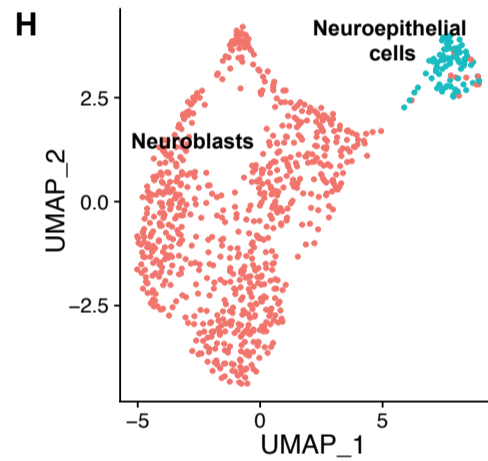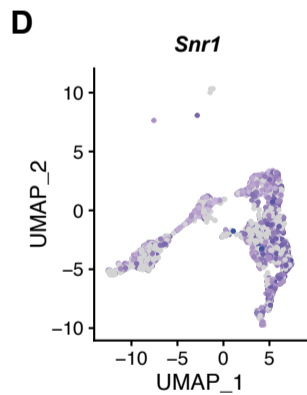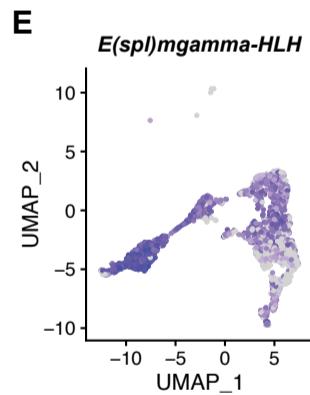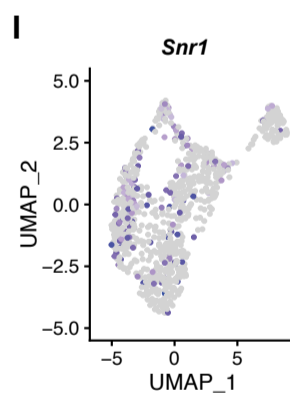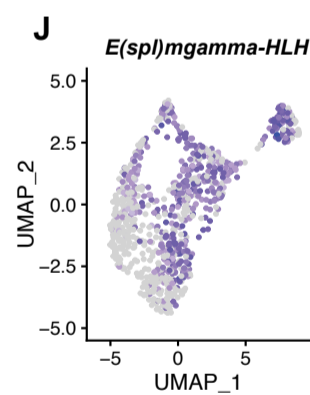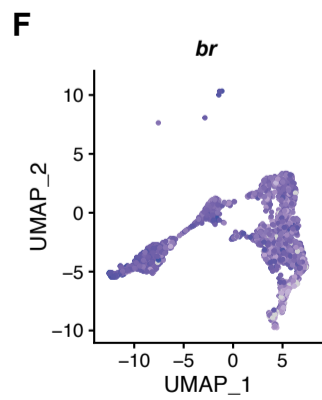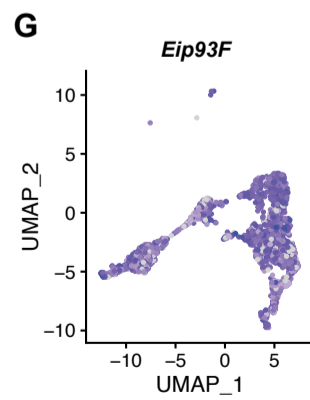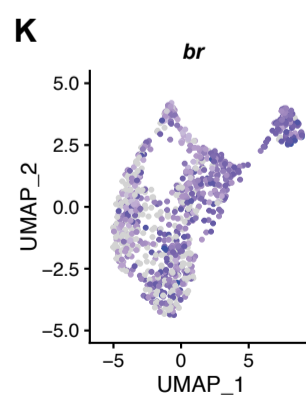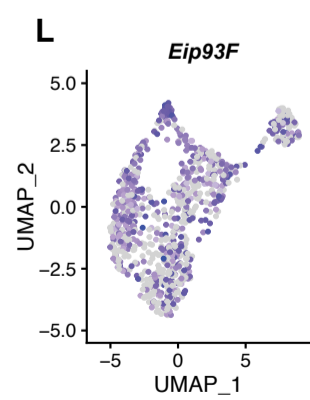

**Fig. S6. Differential mRNA levels of genes in *Snr1* knockdown in neuroepithelial cells.** A) Differential expression of *E(spl)* genes. B) Differential expression of adhesion genes. C) UMAP of control optic lobe cells. D-G) UMAPs showing gene expression in cells shown in C. H) UMAP of optic lobe cells from brains expressing *Snr1*<sup>RNAi</sup> in neuroepithelial cells. I-L) UMAPs showing gene expression in cells shown in H.

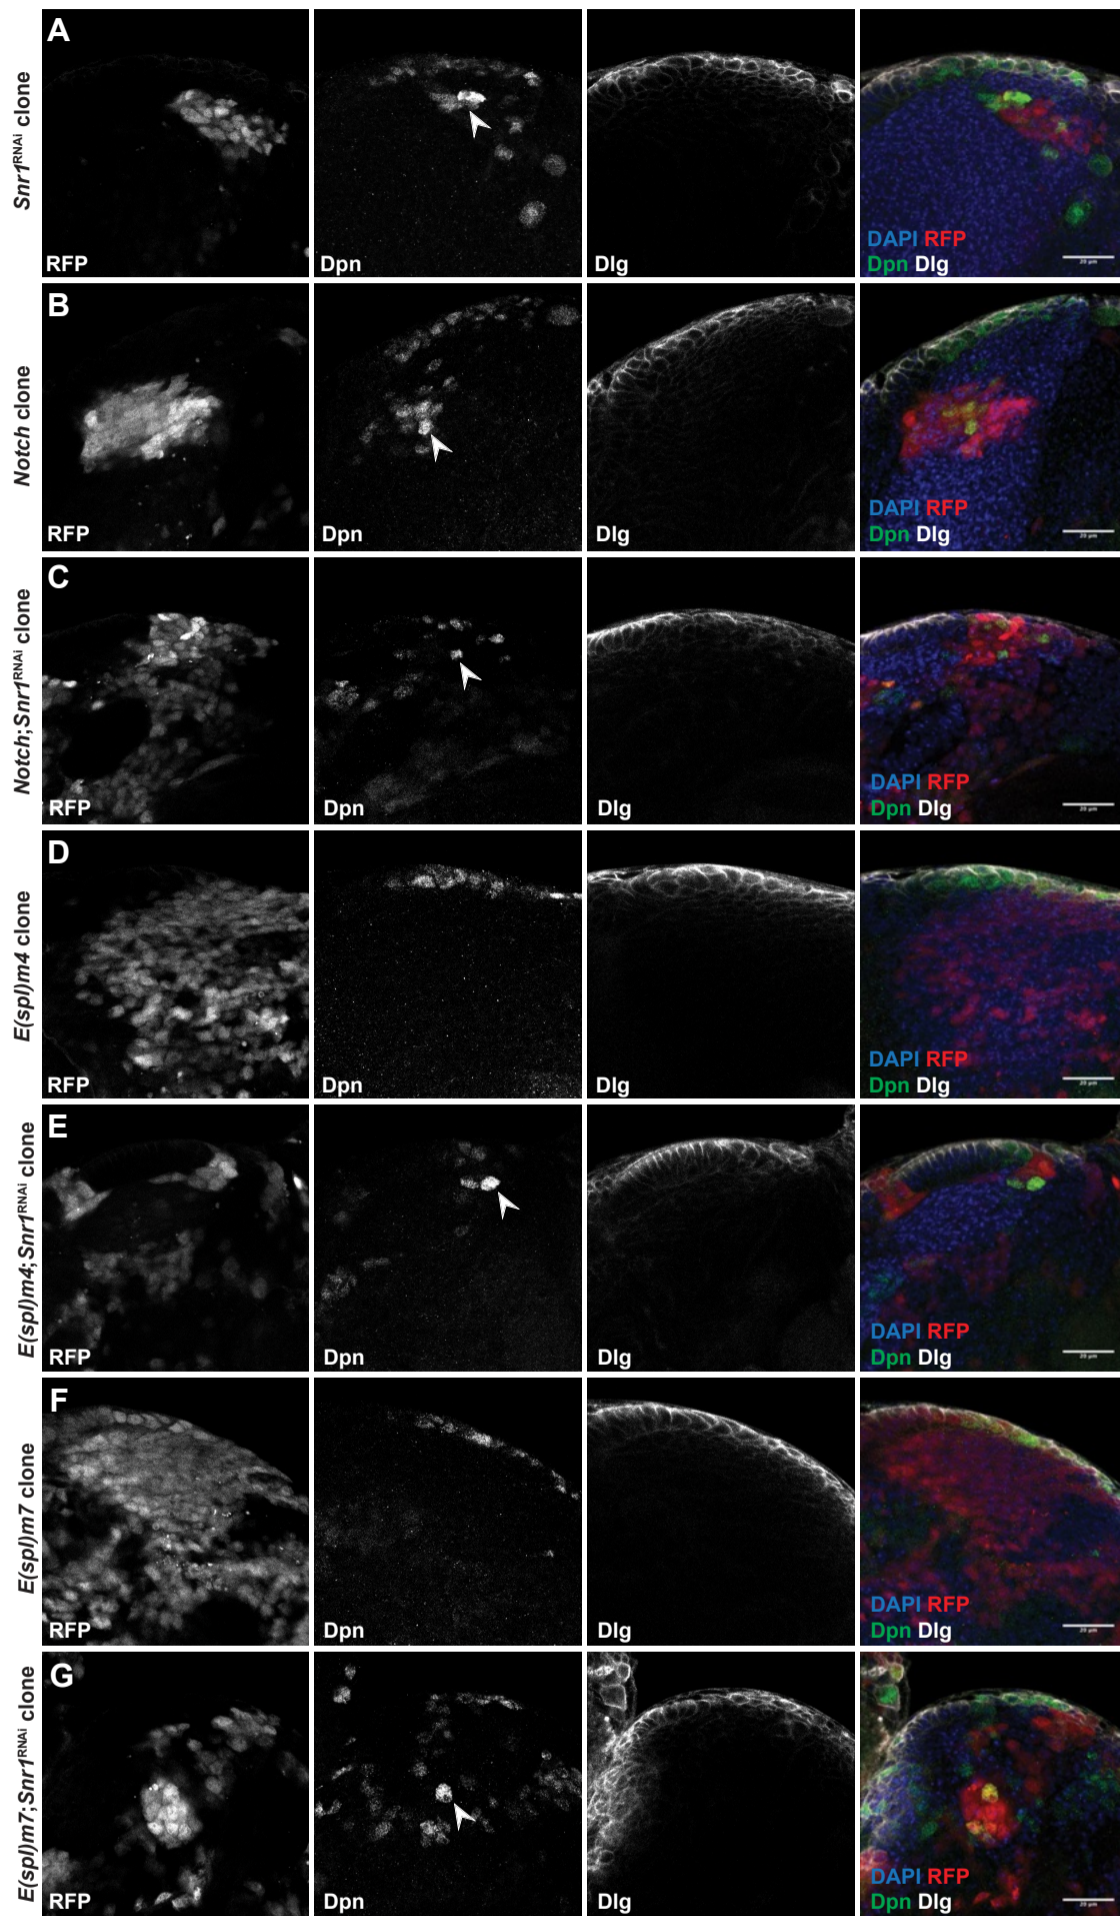

**Fig. S7. Over-expression of Notch pathway genes partially rescues *Snr1* knockdown phenotype.** FLP-out clones expressing A) *Snr1*<sup>RNAi</sup>, B) *UAS-Notch*, C) *UAS-Notch; Snr1*<sup>RNAi</sup>, D) *UAS-E(spl)m4-BFM*, E) *UAS-E(spl)m4-BFM; Snr1*<sup>RNAi</sup>, F) *UAS-E(spl)m7-HLH*, and G) *UAS-E(spl)m7-HLH; Snr1*<sup>RNAi</sup>. A-G) Clones marked by RFP. Scale bars = 20  $\mu$ m.



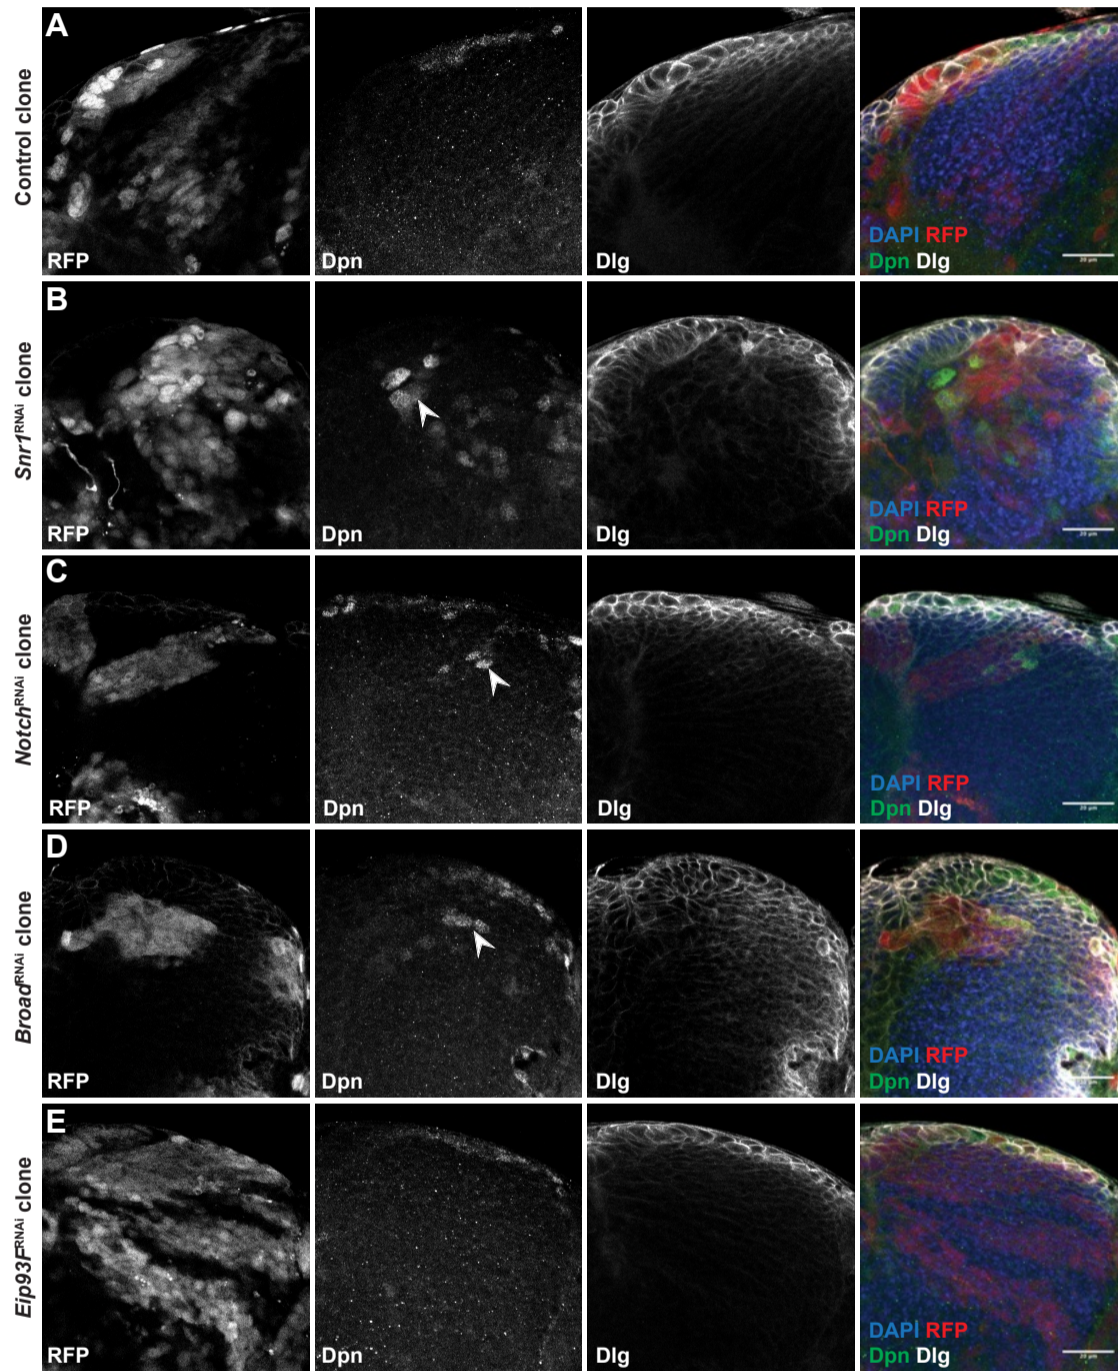

**Fig. S8. Knockdown of Snr1 target genes recapitulate *Snr1*<sup>RNAi</sup> phenotype.** A) Control FLP-out clone shown in cross section. B) *Snr1*<sup>RNAi</sup> clone. C) *Notch*<sup>RNAi</sup> clone. D) *Broad*<sup>RNAi</sup> clone. E) *Eip93F*<sup>RNAi</sup> clone. A-E) Clones marked by RFP. Scale bars = 20  $\mu$ m.

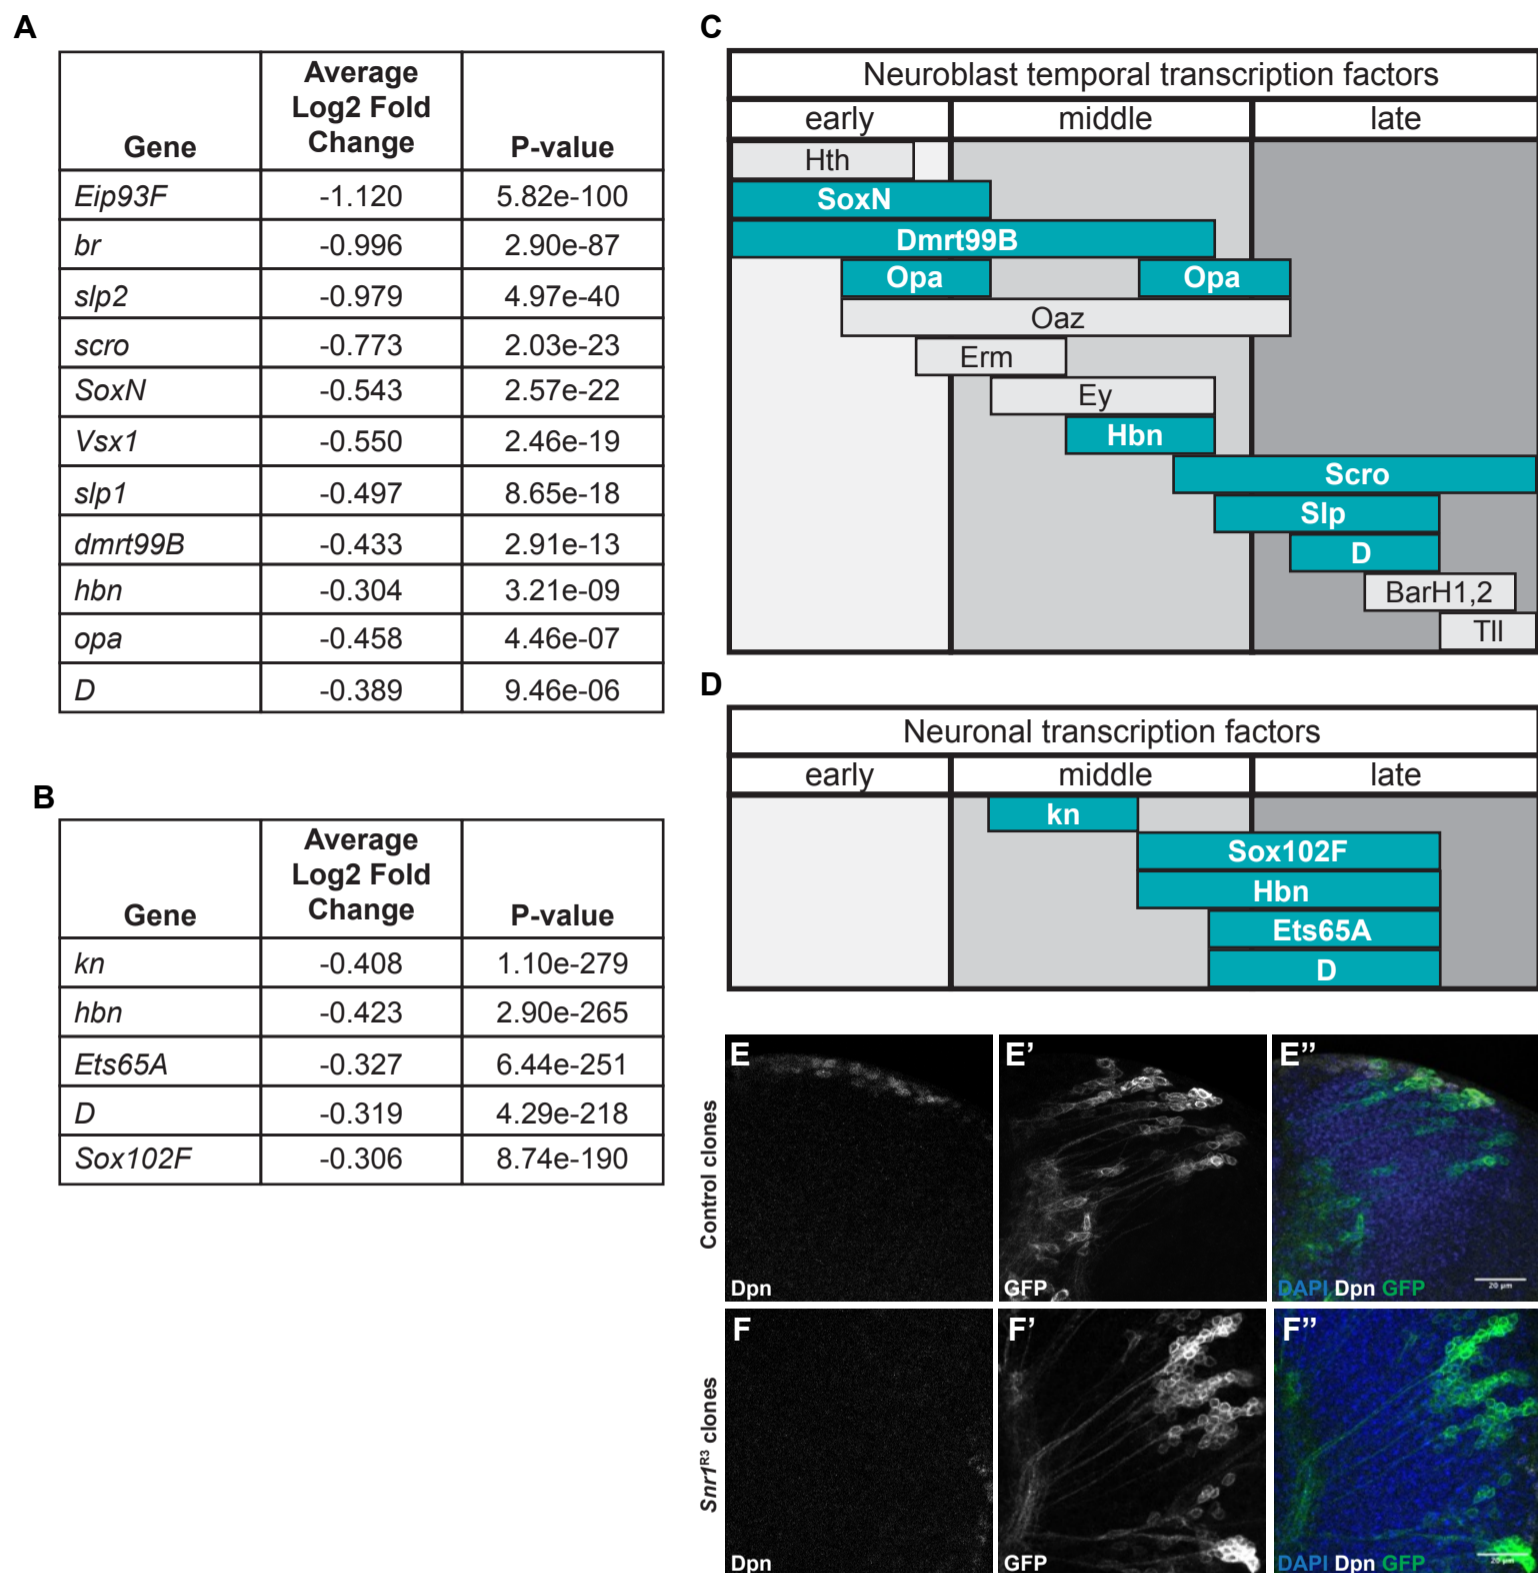

**Fig. S9. Knockdown of *Snr1* in neuroepithelial cells alters expression of temporal and spatial transcription factors in neuroblasts and neurons.** A) Differential mRNA expression between control optic lobe neuroblast and optic lobe neuroblasts from brain with *Snr1*<sup>RNAi</sup> in neuroepithelial cells. B) Differential expression between control optic lobe neurons and *Snr1* knockdown brains. C) Schematic of expression of temporal series of optic lobe neuroblast transcription factors. D) Subset of neuronal transcription factors which were differentially expressed in neurons in the *Snr1* knockdown in neuroepithelial cells. C and D were modified from Konstantinides et al. (2022) and Zhu et al. (2022). Differentially expressed genes shown in blue. E-E'') Control MARCM clones and F-F'') *Snr1*<sup>R3</sup> MARCM clones generated in mid 3<sup>rd</sup> instar larvae. Scale bars = 20  $\mu$ m.

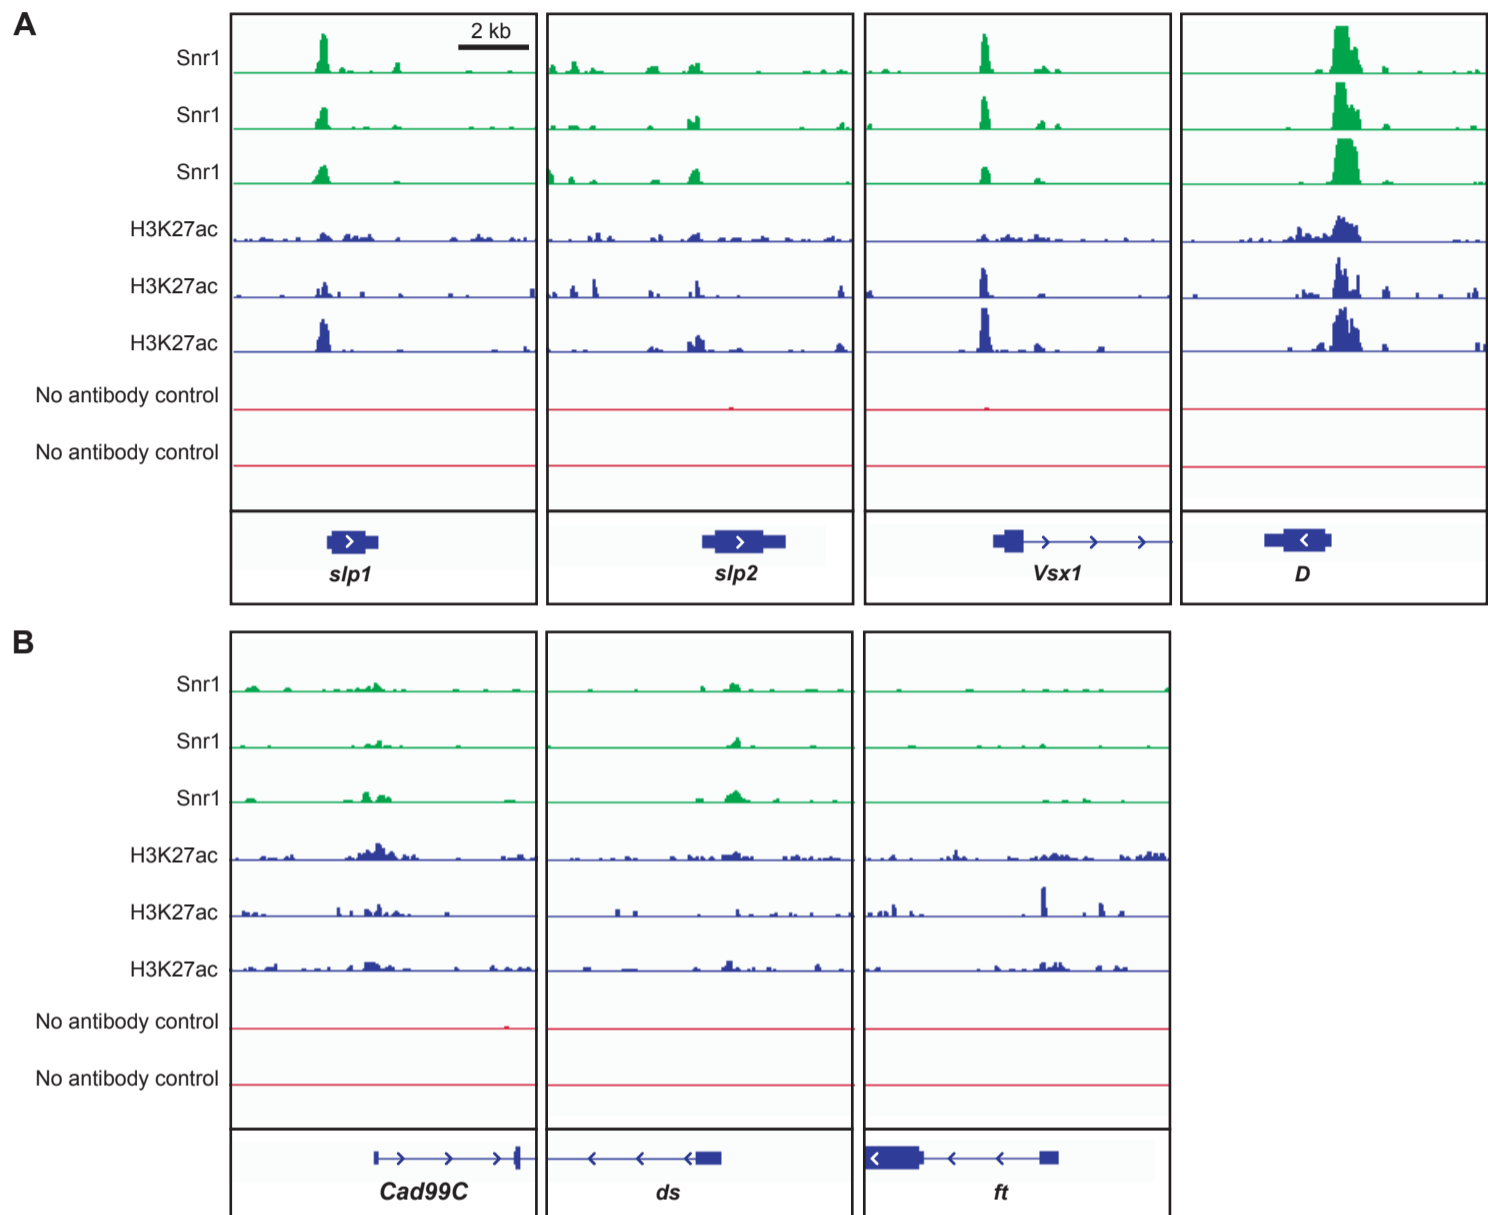

**Fig. S10. Snr1 chromatin occupancy at genes involved in optic lobe development.** Local chromatin landscapes at specific gene loci. A) Temporal and spatial transcription factors that had reduced expression due to Snr1 knockdown. B) Cadherin family members which increased expression due to *Snr1* knockdown.

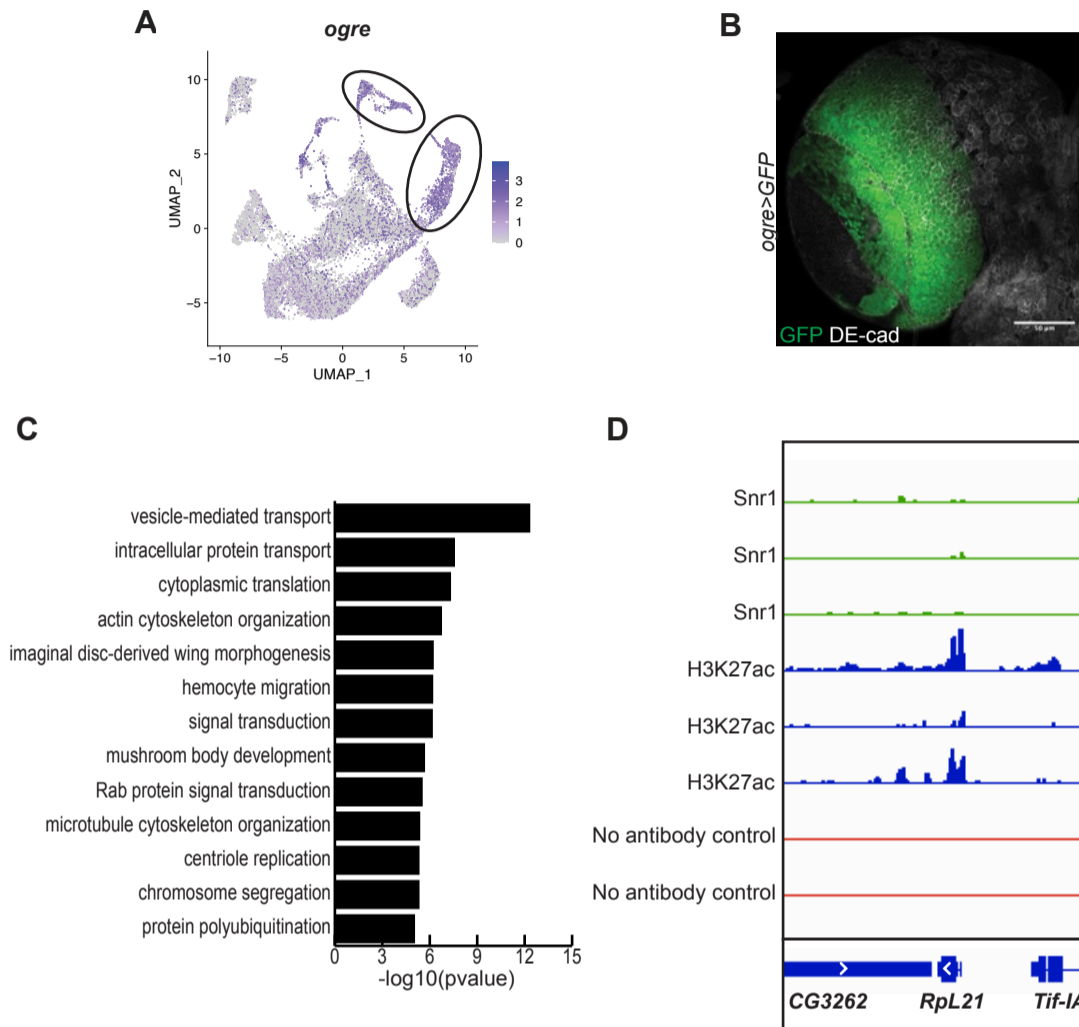

**Fig. S11. OGRE is expressed in multiple cell types in the optic lobe.** A) UMAP of the entire brain showing increased *ogre* expression in neuroepithelial and neuroblast clusters (circled). B) UAS-GFP expression under the control of the *ogre*-GAL4 promoter. C) Over-represented gene ontology terms associated with genes bound by H3K27ac but not Snr1. D) Example of gene (*RpL21*) with low Snr1 signal.

**Table S1. List of differentially expressed genes between control and *Snr1*<sup>RNAi</sup> neuroepithelial cell. Genes with p<0.01 shown.**

[Click here to download Table S1](#)

**Table S2. List of differentially expressed genes between control and *Snr1*<sup>RNAi</sup> neuroblasts. Genes with p<0.01 shown.**

[Click here to download Table S2](#)

**Table S3. List of top 10% of genes with *Snr1* occupancy in CUT&TAG analysis.**

[Click here to download Table S3](#)

**Konstantinides, N., Holguera, I., Rossi, A. M., Escobar, A., Dudragne, L., Chen, Y.-C., Tran, T. N., Martínez Jaimes, A. M., Özel, M. N., Simon, F. et al. (2022).** A complete temporal transcription factor series in the fly visual system. *Nature* **604**, 316-322.  
**Zhu, H., Zhao, S. D., Ray, A., Zhang, Y. and Li, X. (2022).** A comprehensive temporal patterning gene network in *Drosophila* medulla neuroblasts revealed by single-cell RNA sequencing. *Nature Communications* **13**, 1247.
